# Supplementary material
Source: PubMed Central journal article supplement (PMC8979562)
Supplement: mmc1.pdf [file mmc1.pdf]

# THE LANCET

## Infectious Diseases

### Supplementary appendix

This appendix formed part of the original submission and has been peer reviewed. We post it as supplied by the authors.

Supplement to: Muthu V, Agarwal R, Patel A, et al. Definition, diagnosis, and management of COVID-19-associated pulmonary mucormycosis: Delphi consensus statement from the Fungal Infection Study Forum and Academy of Pulmonary Sciences, India. *Lancet Infect Dis* 2022; published online April 4. [https://doi.org/10.1016/S1473-3099\(22\)00124-4](https://doi.org/10.1016/S1473-3099(22)00124-4).

## Supplementary appendix:

Article title: Definition, diagnosis, and management of COVID-19-associated pulmonary mucormycosis: Delphi consensus statement from the Fungal Infection Study Forum and Academy of Pulmonary Sciences (FISF-APS), India.

### Contents:

| <b>Index*</b>                                                                                 | <b>Page number</b> |
|-----------------------------------------------------------------------------------------------|--------------------|
| Supplemental tables                                                                           |                    |
| Table S1                                                                                      | 2                  |
| Table S2                                                                                      | 3                  |
| Table S3                                                                                      | 4                  |
| Supplemental Figures                                                                          |                    |
| Figure S1                                                                                     | 5                  |
| Figure S2                                                                                     | 6                  |
| Figure S3                                                                                     | 7                  |
| Figure S4                                                                                     | 8                  |
| Methodology of systematic review                                                              | 9-25               |
| Key articles used to guide the formulation of questions to be addressed by the Delphi process | 26-30              |

\*Click on the title or the page number to go to a section

Supplemental tables:

Table S1: Prevalence of COVID-19-associated mucormycosis (CAM) and COVID-19-associated pulmonary mucormycosis (CAPM) from the published literature

| <b>Country</b> | <b>Reference</b>        | <b>Prevalence of CAM</b>                                                                     | <b>Prevalence of CAPM</b>                                                           |
|----------------|-------------------------|----------------------------------------------------------------------------------------------|-------------------------------------------------------------------------------------|
| India          | Patel et al(6)          | 0.27% of hospitalized COVID-19                                                               | 0.15% of hospitalized COVID-19                                                      |
| India          | Ramaswami et al(14)     | 1.6% of COVID-19 patients in ICU<br>4.3% (70/1,647) ED admission                             |                                                                                     |
| India          | Selarka et al(15)       | 1.8% of hospitalized COVID-19                                                                | NA                                                                                  |
| Chile          | Rabagliati et al(19)    | -                                                                                            | 0.12% of hospitalized COVID-19                                                      |
| Germany        | Seidel et al(16)        | 0.15% to 0.67% of hospitalized COVID-19<br>In COVID-19 ICU patients, 1.47% to 1.68%          | -                                                                                   |
| Mexico         | Guzmán-Castro et al(13) | 0.04% of COVID-19 diagnosed during the study period (both hospitalized and non-hospitalized) | 0.007% of COVID-19 (both hospitalized and non-hospitalized) during the study period |
| France         | Danion et al(18)        | 0.004% of COVID-19 hospitalized in France during the study period                            | 0.004% of COVID-19 hospitalized in France during the study period                   |
| Turkey         | Bayram et al(17)        | 0.03% of hospitalized COVID-19                                                               | NA                                                                                  |
| France         | Gangneux et al(12)      |                                                                                              | 1% of mechanically ventilated subjects COVID-19                                     |

COVID-19 – coronavirus disease; ED – emergency department; ICU -intensive care unit

Table S2: Computed tomography findings of COVID-19-associated pulmonary mucormycosis (CAPM) versus COVID-19-associated pulmonary aspergillosis (CAPA)

| <b>Highly suggestive</b>                        | <b>CAPM</b> | <b>CAPA*</b> |
|-------------------------------------------------|-------------|--------------|
| Thick-walled cavity                             | +++         | ++           |
| Reversed halo sign                              | +++         | +            |
| Large consolidation or necrotizing pneumonia    | +++         | ++           |
| Mycotic aneurysm                                | +++         | +            |
| Bird's nest sign                                | +++         | +            |
| Multiple large nodules (nodules >1cm)           | +++         | ++           |
| Halo sign                                       | +           | +++          |
| Air crescent sign                               | +           | +++          |
| <b>Suggestive</b>                               |             |              |
| Pleural effusion                                | +++         | +            |
| <b>Non-specific</b>                             |             |              |
| Pneumothorax                                    | ++          | ++           |
| Centrilobular nodules or tree-in-bud appearance | -           | +++          |

\*or dual infections

Table S3: Diagnosis of dual infections, COVID-19-associated pulmonary mucormycosis (CAPM) versus COVID-19-associated pulmonary aspergillosis (CAPA) in different categories

| Category                         | Diagnostic features                                                                                                                                                                                                                                                                                                                                                                                                                                                                                              |
|----------------------------------|------------------------------------------------------------------------------------------------------------------------------------------------------------------------------------------------------------------------------------------------------------------------------------------------------------------------------------------------------------------------------------------------------------------------------------------------------------------------------------------------------------------|
| Proven CAPM with Proven CAPA     | Lung aspirate/biopsy/pleural fluid with: <ol style="list-style-type: none"> <li>1. Aseptate and septate hyphae seen on histopathology/direct microscopy</li> <li>2. Aseptate hyphae on microscopy with <i>Aspergillus</i> growing in culture</li> <li>3. Septate hyphae on microscopy with Mucorales growing in culture</li> <li>4. Growth of both <i>Aspergillus</i> and Mucorales in culture</li> </ol> Culture positivity should prompt a search for corresponding hyphal morphology in the original specimen |
| Proven CAPM with probable CAPA   | Lung aspirate/biopsy/pleural fluid with aseptate hyphae or Mucorales grown in culture AND<br>BAL fluid showing septate hyphae or BAL growing <i>Aspergillus</i> or serum GM ODI >0.5 or BAL GM ODI >1                                                                                                                                                                                                                                                                                                            |
| Proven CAPM with possible CAPA   | Lung aspirate/biopsy/pleural fluid with aseptate hyphae or growth of Mucorales AND<br>Non-BAL LRT sample showing septate hyphae/growth of <i>Aspergillus</i> or non-BAL GM ODI >4.5 or non-BAL GM ODI >1.2 on at least two occasions                                                                                                                                                                                                                                                                             |
| Probable CAPM with proven CAPA   | Lung aspirate/biopsy/pleural fluid with septate hyphae or <i>Aspergillus</i> grown in culture AND<br>Aseptate hyphae on cytology or direct microscopy or growth of Mucorales in BAL fluid                                                                                                                                                                                                                                                                                                                        |
| Probable CAPM with probable CAPA | Clinical and radiological features consistent with CAPM/CAPA with: <ol style="list-style-type: none"> <li>1. Aseptate hyphae on cytology or direct microscopy or growth of Mucorales in BAL fluid AND</li> <li>2. BAL fluid showing septate hyphae or growth of <i>Aspergillus</i> or serum GM ODI &gt;0.5 or BAL GM ODI &gt;1</li> </ol>                                                                                                                                                                        |
| Probable CAPM with possible CAPA | Clinical and radiological features consistent with CAPM/CAPA with: <ol style="list-style-type: none"> <li>1. Aseptate hyphae on cytology/direct microscopy or growth of Mucorales in BAL fluid AND</li> <li>2. Non-BAL LRT sample showing septate hyphae or growth of <i>Aspergillus</i> or non-BAL GM &gt;4.5 or non-BAL GM &gt;1.2 on at least two occasions</li> </ol>                                                                                                                                        |

BAL: bronchoalveolar lavage; GM: galactomannan; LRT: Lower respiratory tract; Non-BAL: non-bronchoscopic specimens like mini-BAL or bronchial wash or endotracheal aspirates; ODI: optical density index

**Supplemental figures:**

**Figure S1:** The Delphi methodology followed in the development of consensus opinion for defining, diagnosing, and managing COVID-19-associated pulmonary mucormycosis (CAPM)

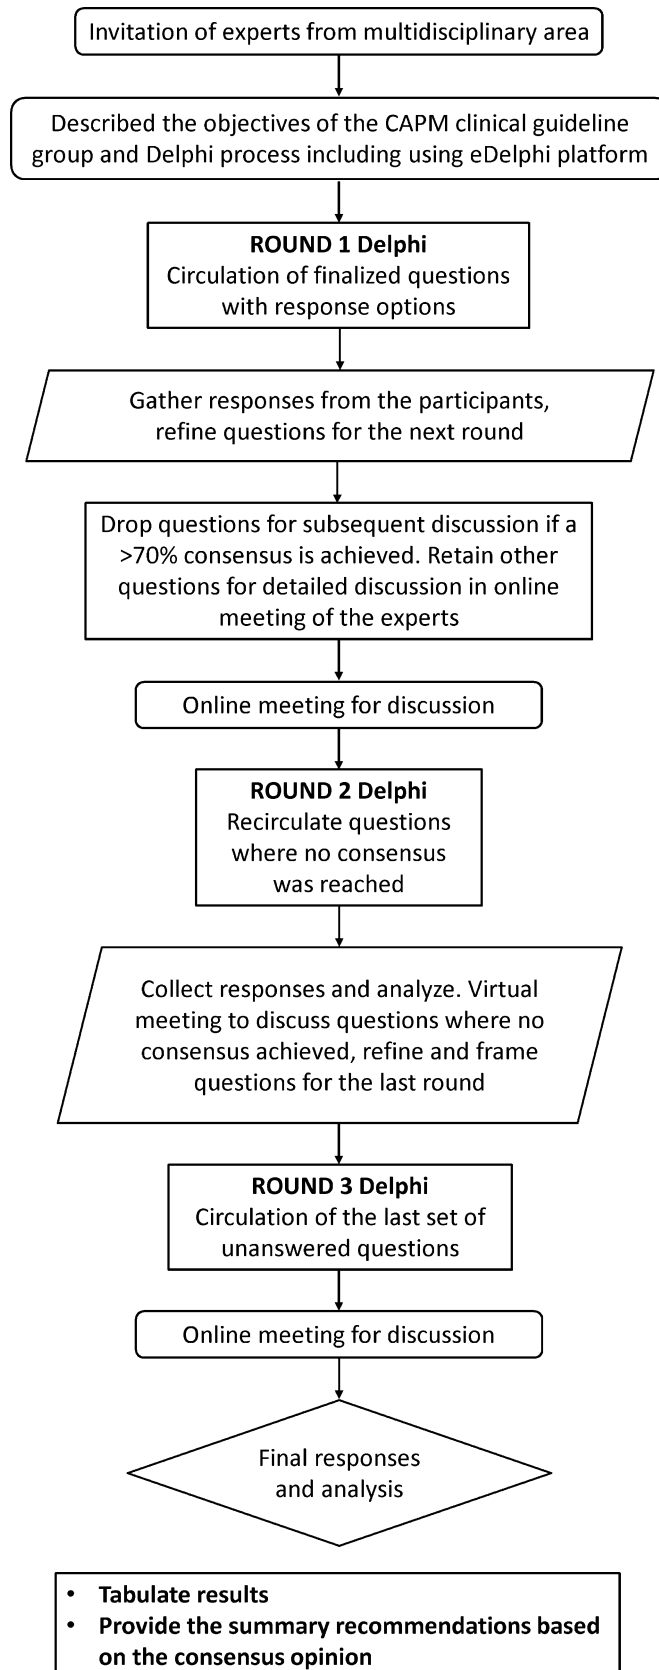

**Figure S2:** Forest plot showing the prevalence of COVID-19-associated pulmonary mucormycosis (CAPM) among hospitalized COVID-19 patients. Each square represents the proportion of patients with CAPM, and the horizontal line represents the corresponding 95% confidence interval. The pooled proportion of CAPM among subjects hospitalized with COVID-19 is presented as a diamond.

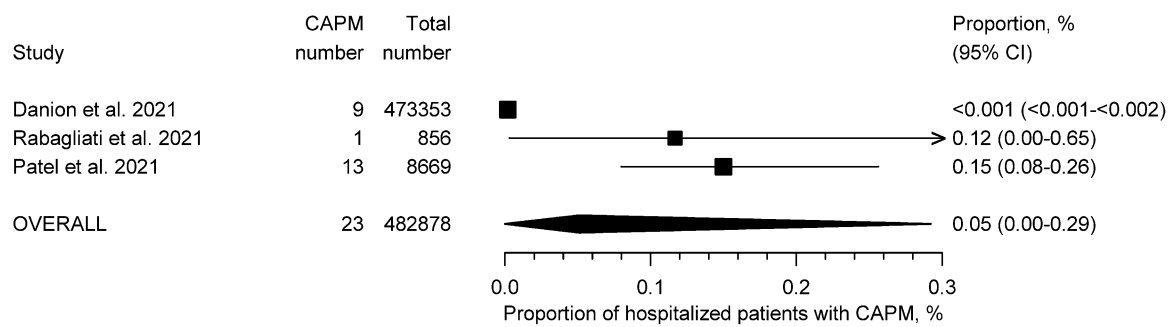

**Figure S3:** Computed tomography findings in patients with microbiologically confirmed COVID-19-associated pulmonary mucormycosis (CAPM): (A) reversed halo sign evolving into a cavity (white arrow) on the left side along with mild pleural effusion (black arrowhead), also seen are intralobular septal thickening on the contralateral lung (white arrowhead). (B) Imaging from another CAPM patient demonstrating a cavity (black arrow) on the left side with intracavity contents and internal septations. (C) Mediastinal window of a patient with proven CAPM showing abscess in the right lower lobe with mycotic aneurysm (white arrow) and minimal pleural effusion.

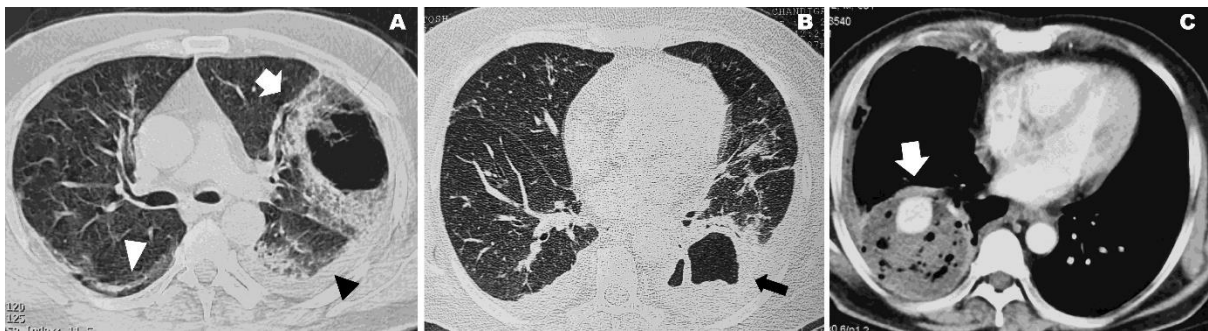



**Figure S4:** Panel A shows the photomicrograph of a cavity colonized by entangled mass of fungal hyphae conforming to the morphology of *Aspergillus* (black arrows) and the periphery showing infarcted lung parenchyma with fungal hyphae suggestive of mucormycosis. Panel B demonstrates the morphology of fungi conforming to mucormycosis that is better appreciated in this photomicrograph obtained from a site away from the cavity wall. Panel C shows the photomicrograph of bland necrosis with numerous fungal hyphae; some with thin wall and foldable consistent with Mucormycosis (black arrow) and some with septate hyphae conforming to the morphology of *Aspergillus* (blue arrow).

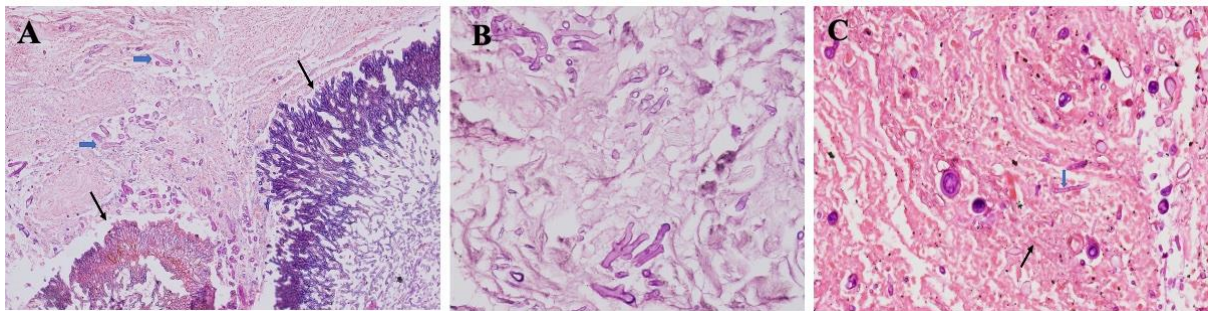

### **Methodology of systematic review:**

We performed a systematic review (Figure) of the PubMed and Embase databases (till 25th September 2021), using the following free text search terms: (“COVID” OR “SARS-CoV” OR “coronavirus”) AND (mucor\* OR “zygomycosis”). The references obtained from the search were imported to a commercially available reference manager software (Endnote). After excluding duplicate citations and unrelated articles, we reviewed 236 articles in detail. We reviewed the articles reporting cases of COVID-19-associated pulmonary mucormycosis (CAPM), relevant review articles and large series of COVID-19-associated mucormycosis (CAM) to identify the questions to be addressed. Three authors (VM, RA, and AC) formulated the initial set of questions based on the literature review. The questions were further refined by incorporating the comments received from the CAPM guideline group.

Citations reviewed for formulating the questions for Delphi consensus are provided below:

#### **Article describing cases of CAPM: (n=25)<sup>1-25</sup>**

1. Hanley B, Naresh KN, Roufousse C, et al. Histopathological findings and viral tropism in UK patients with severe fatal COVID-19: a post-mortem study. *Lancet Microbe* 2020; **1**(6): e245-e53.
2. Pasero D, Sanna S, Liperi C, et al. A challenging complication following SARS-CoV-2 infection: a case of pulmonary mucormycosis. *Infection* 2020: 1-6.
3. Placik DA, Taylor WL, Wnuk NM. Bronchopleural fistula development in the setting of novel therapies for acute respiratory distress syndrome in SARS-CoV-2 pneumonia. *Radiol Case Rep* 2020; **15**(11): 2378-81.
4. Alfishawy M, Elbendary A, Younes A, et al. Diabetes mellitus and Coronavirus Disease (Covid-19) Associated Mucormycosis (CAM): A wake-up call from Egypt. *Diabetes Metab Syndr* 2021; **15**(5): 102195.
5. Bellanger AP, Navellou JC, Lepiller Q, et al. Mixed mold infection with *Aspergillus fumigatus* and *Rhizopus microsporus* in a severe acute respiratory syndrome Coronavirus 2 (SARS-CoV-2) patient. *Infect Dis Now* 2021; **51**(7): 633-5.
6. Buil JB, van Zanten ARH, Bentvelsen RG, et al. Case series of four secondary mucormycosis infections in COVID-19 patients, the Netherlands, December 2020 to May 2021. *Euro Surveill* 2021; **26**(23).
7. Chennamchetty VK, Adimulapu S, Kola BP, et al. Post-COVID pulmonary mucormycosis- A case report. *IP Indian Journal of Immunology and Respiratory Medicine* 2021; **6**(1): 62-6.
8. Dantis K, Rathore V, Kashyap NK, Gupta N, De S, Singha SK. SARS-CoV-2 sequel: Pulmonary mucormycosis with a mycotic aneurysm in a transplant recipient. *Tuberc Respir Dis (Seoul)* 2021.

9. Fernández-García O, Guerrero-Torres L, Roman-Montes CM, et al. Isolation of *Rhizopus microsporus* and *Lichtheimia corymbifera* from tracheal aspirates of two immunocompetent critically ill patients with COVID-19. *Med Mycol Case Rep* 2021; **33**: 32-7.
10. Garg D, Muthu V, Sehgal IS, et al. Coronavirus Disease (Covid-19) Associated Mucormycosis (CAM): Case Report and Systematic Review of Literature. *Mycopathologia* 2021; **186**(2): 289-98.
11. Garg M, Prabhakar N, Muthu V, et al. CT Findings of COVID-19-associated Pulmonary Mucormycosis: A Case Series and Literature Review. *Radiology* 2021: 211583.
12. Johnson AK, Ghazarian Z, Cendrowski KD, Persichino JG. Pulmonary aspergillosis and mucormycosis in a patient with COVID-19. *Med Mycol Case Rep* 2021; **32**: 64-7.
13. Kanwar A, Jordan A, Olewiler S, Wehberg K, Cortes M, Jackson BR. A Fatal Case of *Rhizopus azygosporus* Pneumonia Following COVID-19. *J Fungi (Basel)* 2021; **7**(3).
14. Krishna V, Morjaria J, Jalandari R, Omar F, Kaul S. Autoptic identification of disseminated mucormycosis in a young male presenting with cerebrovascular event, multi-organ dysfunction and COVID-19 infection. *IDCases* 2021; **25**: e01172.
15. Kula BE, Clancy CJ, Hong Nguyen M, Schwartz IS. Invasive mould disease in fatal COVID-19: a systematic review of autopsies. *Lancet Microbe* 2021; **2**(8): e405-e14.
16. Lai CC, Wu CJ, Lee YC, Liu WL. COVID-19 associated with concomitant mucormycosis and aspergillosis. *J Microbiol Immunol Infect* 2021.
17. Meawed TE, Ahmed SM, Mowafy SMS, Samir GM, Anis RH. Bacterial and fungal ventilator associated pneumonia in critically ill COVID-19 patients during the second wave. *J Infect Public Health* 2021.
18. Meshram HS, Kute VB, Chauhan S, Desai S. Mucormycosis in post-COVID-19 renal transplant patients: A lethal complication in follow-up. *Transpl Infect Dis* 2021; **23**(4): e13663.
19. Muthu V, Kumar M, Paul RA, et al. Is there an association between zinc and COVID-19-associated mucormycosis? Results of an experimental and clinical study. *Mycoses* 2021; **64**(10): 1291-7.
20. Muthu V, Rudramurthy SM, Chakrabarti A, Agarwal R. Epidemiology and Pathophysiology of COVID-19-Associated Mucormycosis: India Versus the Rest of the World. *Mycopathologia* 2021: 1-16.
21. Patel A, Agarwal R, Rudramurthy SM, et al. Multicenter Epidemiologic Study of Coronavirus Disease-Associated Mucormycosis, India. *Emerg Infect Dis* 2021; **27**(9): 2349-59.
22. Rabagliati R, Rodríguez N, Núñez C, Huete A, Bravo S, García P. Covid-19-associated mold infection in critically ill patients, Chile. *Emerging Infectious Diseases* 2021; **27**(5): 1454-6.

23. Rana G, Gautam S, Mawari G, Daga MK, Kumar N, Raghu RV. Massive hemoptysis causing mortality in a post COVID-19 infected Asian male patient: Presenting as pulmonary mucormycosis, pulmonary tuberculosis and later sino-nasal mucormycosis. *Respir Med Case Rep* 2021; **34**: 101511.
24. Vayntrub Y, Banerjee D. Disseminated mucormycosis in a young patient with diabetic ketoacidosis. *American Journal of Respiratory and Critical Care Medicine* 2021; **203**(9).
25. Zurl C, Hoenigl M, Schulz E, et al. Autopsy Proven Pulmonary Mucormycosis Due to *Rhizopus microsporus* in a Critically Ill COVID-19 Patient with Underlying Hematological Malignancy. *J Fungi (Basel)* 2021; **7**(2).

**Articles discussing non-pulmonary COVID-19-associated mucormycosis: (n=118)<sup>26-143</sup>**

26. Do Monte ES, Dos Santos MEL, Ribeiro IB, et al. Rare and fatal gastrointestinal mucormycosis (Zygomycosis) in a COVID-19 patient: A case report. *Clinical Endoscopy* 2020; **53**(6): 746-9.
27. Mehta S, Pandey A. Rhino-Orbital Mucormycosis Associated With COVID-19. *Cureus* 2020; **12**(9): e10726.
28. Monte Junior ESD, Santos M, Ribeiro IB, et al. Rare and Fatal Gastrointestinal Mucormycosis (Zygomycosis) in a COVID-19 Patient: A Case Report. *Clin Endosc* 2020; **53**(6): 746-9.
29. Erratum: COVID-19 and orbital mucormycosis. *Indian J Ophthalmol* 2021; **69**(7): 1978.
30. Abdel-Aziz M, Azab N. Acute Invasive Fungal Rhinosinusitis and Coronavirus Disease 2019. *J Craniofac Surg* 2021.
31. Ahmadikia K, Hashemi SJ, Khodavaisy S, et al. The double-edged sword of systemic corticosteroid therapy in viral pneumonia: A case report and comparative review of influenza-associated mucormycosis versus COVID-19 associated mucormycosis. *Mycoses* 2021; **64**(8): 798-808.
32. Ahmed E, Abou-Bakr A, Hussein RR, El-Gawish AA, Ras AE, Ghalwash DM. Oral mucormycosis in post-COVID-19 patients: A case series. *Oral Dis* 2021.
33. Alekseyev K, Didenko L, Chaudhry B. Rhinocerebral Mucormycosis and COVID-19 Pneumonia. *J Med Cases* 2021; **12**(3): 85-9.
34. Arana C, Cuevas Ramírez RE, Xipell M, et al. Mucormycosis associated with COVID-19 in two kidney transplant patients. *Transpl Infect Dis* 2021; **23**(4): e13652.
35. Arjun R, Felix V, Niyas VKM, et al. COVID-19 associated Rhino-orbital Mucormycosis: a Single Centre Experience of Ten Cases. *Qjm* 2021.
36. Arora R, Goel R, Khanam S, et al. Rhino-Orbito-Cerebral-Mucormycosis During the COVID-19 Second Wave in 2021 - A Preliminary Report from a Single Hospital. *Clin Ophthalmol* 2021; **15**: 3505-14.

37. Ashour MM, Abdelaziz TT, Ashour DM, Askoura A, Saleh MI, Mahmoud MS. Imaging spectrum of acute invasive fungal rhino-orbital-cerebral sinusitis in COVID-19 patients: A case series and a review of literature. *J Neuroradiol* 2021; **48**(5): 319-24.
38. Asri S, Akram MR, Hasan MM, et al. The risk of cutaneous mucormycosis associated with COVID-19: A perspective from Pakistan. *Int J Health Plann Manage* 2021.
39. Avatef Fazeli M, Rezaei L, Javadirad E, et al. Increased incidence of rhino-orbital mucormycosis in an educational therapeutic hospital during the COVID-19 pandemic in western Iran: An observational study. *Mycoses* 2021.
40. Awal SS, Biswas SS, Awal SK. Rhino-orbital mucormycosis in COVID-19 patients—a new threat? *Egyptian Journal of Radiology and Nuclear Medicine* 2021; **52**(1).
41. Balaji SM. Dental surveillance for Post-COVID mucormycosis. *Indian J Dent Res* 2021; **32**(1): 2.
42. Barman Roy D, Gupta V, Biswas A, Verma M. Early Surgical Intervention Followed by Antifungals in Rhino-Orbital Mucormycosis in Patients With COVID-19 Favors Clinical Outcome: A Case Series. *Cureus* 2021; **13**(8): e17178.
43. Baskar HC, Chandran A, Reddy CS, Singh S. Rhino-orbital mucormycosis in a COVID-19 patient. *BMJ Case Rep* 2021; **14**(6).
44. Bayram N, Ozsaygılı C, Sav H, et al. Susceptibility of severe COVID-19 patients to rhino-orbital mucormycosis fungal infection in different clinical manifestations. *Jpn J Ophthalmol* 2021; **65**(4): 515-25.
45. Bhanuprasad K, Manesh A, Devasagayam E, et al. Risk factors associated with the mucormycosis epidemic during the COVID-19 pandemic. *Int J Infect Dis* 2021; **111**: 267-70.
46. Bhattacharyya A, Sarma P, Sharma DJ, et al. Rhino-orbital-cerebral-mucormycosis in COVID-19: A systematic review. *Indian J Pharmacol* 2021; **53**(4): 317-27.
47. Bonates P, João GAP, Cruz KS, et al. Fatal rhino-orbito-cerebral mucormycosis infection associated with diabetic ketoacidosis post-COVID-19. *Rev Soc Bras Med Trop* 2021; **54**: e03582021.
48. Boodman C, Cheng MP. Nosocomial mucormycosis of the thigh. *IDCases* 2021; **25**: e01225.
49. Chauhan K, Soni D, Sarkar D, et al. Mucormycosis after COVID-19 in a patient with diabetes. *Lancet* 2021; **398**(10301): e10.
50. Choudhary GR, Aggarwal A, Jain V, Jena R. COVID-19 and fatal renal mucormycosis: Contributory or coincidental? *Indian J Urol* 2021; **37**(3): 270-3.
51. Chouhan M, Solanki B, Shakrawal N. Rhino-orbital-cerebral mucormycosis: fungal epidemic in a viral pandemic. *J Laryngol Otol* 2021: 1-6.

52. Dallalzadeh LO, Ozzello DJ, Liu CY, Kikkawa DO, Korn BS. Secondary infection with rhino-orbital cerebral mucormycosis associated with COVID-19. *Orbit* 2021: 1-4.
53. Dave TV, Gopinathan Nair A, Hegde R, et al. Clinical Presentations, Management and Outcomes of Rhino-Orbital-Cerebral Mucormycosis (ROCM) Following COVID-19: A Multi-Centric Study. *Ophthalmic Plast Reconstr Surg* 2021; **37**(5): 488-95.
54. Desai EJ, Pandya A, Upadhya I, Patel T, Banerjee S, Jain V. Epidemiology, Clinical Features and Management of Rhino Orbital Mucormycosis in Post COVID 19 Patients. *Indian J Otolaryngol Head Neck Surg* 2021: 1-5.
55. Desai SM, Gujarathi-Saraf A, Agarwal EA. Imaging findings using a combined MRI/CT protocol to identify the "entire iceberg" in post-COVID-19 mucormycosis presenting clinically as only "the tip". *Clin Radiol* 2021; **76**(10): 784.e27-.e33.
56. Dilek A, Ozaras R, Ozkaya S, Sunbul M, Sen EI, Leblebicioglu H. COVID-19-associated mucormycosis: Case report and systematic review. *Travel Med Infect Dis* 2021; **44**: 102148.
57. Diwakar J, Samaddar A, Konar SK, et al. First report of COVID-19-associated rhino-orbito-cerebral mucormycosis in pediatric patients with type 1 diabetes mellitus. *J Mycol Med* 2021; **31**(4): 101203.
58. Dubey S, Mukherjee D, Sarkar P, et al. COVID-19 associated rhino-orbital-cerebral mucormycosis: An observational study from Eastern India, with special emphasis on neurological spectrum. *Diabetes Metab Syndr* 2021; **15**(5): 102267.
59. El-Kholy NA, El-Fattah AMA, Khafagy YW. Invasive Fungal Sinusitis in Post COVID-19 Patients: A New Clinical Entity. *Laryngoscope* 2021.
60. Eswaran S, Balan SK, Saravanam PK. Acute Fulminant Mucormycosis Triggered by Covid 19 Infection in a Young Patient. *Indian J Otolaryngol Head Neck Surg* 2021: 1-5.
61. Fouad YA, Abdelaziz TT, Askoura A, et al. Spike in Rhino-Orbital-Cerebral Mucormycosis Cases Presenting to a Tertiary Care Center During the COVID-19 Pandemic. *Front Med (Lausanne)* 2021; **8**: 645270.
62. Garg R, Bharangar S, Gupta S, Bhardwaj S. Post Covid-19 Infection Presenting as Rhino-Orbital Mycosis. *Indian J Otolaryngol Head Neck Surg* 2021: 1-8.
63. Goyal A, Soni K, Sharma V, et al. Rapid Response Preparedness for Management of Post-Covid Invasive Rhino-Orbito-Cerebral Fungal Infections: Experience from a Tertiary Care Government Institute in India. *Indian J Otolaryngol Head Neck Surg* 2021: 1-3.
64. Gupta D, Dosi T. A rare entity to major outbreak: A case report on mucormycosis. *Pan African Medical Journal* 2021; **39**.

65. Gupta DP, Gupta S, Shah CK, Sreevidya SR. Clinical Study of Surge of Mucormycosis in COVID-19 Pandemic: A Tertiary Care Center Study. *Indian J Otolaryngol Head Neck Surg* 2021: 1-8.
66. Gupta KK, Singh A, Kalia A, Kandhola R. Anaesthetic considerations for post-COVID-19 mucormycosis surgery- A case report and review of literature. *Indian J Anaesth* 2021; **65**(7): 545-7.
67. Gupta NK, Kapre M, Gupta H, et al. Risk Based Decision Algorithms for Management of COVID-19 Associated Rhino-orbital Mucormycosis. *Indian J Otolaryngol Head Neck Surg* 2021: 1-8.
68. Gupta SK, Jyotsana P, Singh A, Phuyal D, Allam P. Rhinocerebral mucormycosis in a covid-19 patient from nepal: A case report. *Journal of the Nepal Medical Association* 2021; **59**(239): 703-5.
69. Honavar SG. Code Mucor: Guidelines for the Diagnosis, Staging and Management of Rhino-Orbito-Cerebral Mucormycosis in the Setting of COVID-19. *Indian J Ophthalmol* 2021; **69**(6): 1361-5.
70. Jain M, Tyagi R, Tyagi R, Jain G. Post-COVID-19 Gastrointestinal Invasive Mucormycosis. *Indian J Surg* 2021: 1-3.
71. Joshi AR, Muthe MM, Patankar SH, Athawale A, Achhapalia Y. CT and MRI Findings of Invasive Mucormycosis in the Setting of COVID-19: Experience From A Single Center in India. *AJR Am J Roentgenol* 2021.
72. Karimi-Galougahi M, Arastou S, Haseli S. Fulminant mucormycosis complicating coronavirus disease 2019 (COVID-19). *Int Forum Allergy Rhinol* 2021; **11**(6): 1029-30.
73. Kaur H, Kanaujia R, Rudramurthy SM. Rhizopus homothallicus: An emerging pathogen in era of COVID-19 associated mucormycosis. *Indian J Med Microbiol* 2021.
74. Khatri A, Chang KM, Berlinrut I, Wallach F. Mucormycosis after Coronavirus disease 2019 infection in a heart transplant recipient - Case report and review of literature. *J Mycol Med* 2021; **31**(2): 101125.
75. Khullar T, Kumar J, Sindhu D, Garg A, Meher R, Goel R. Coronavirus disease 2019 associated mucormycosis meandering its way into the orbit: a pictorial review. *J Laryngol Otol* 2021: 1-5.
76. Kumar Gupta S, Jyotsana P, Singh A, Phuyal D, Allam P. Rhinocerebral Mucormycosis in a COVID-19 Patient from Nepal: A Case Report. *JNMA J Nepal Med Assoc* 2021; **59**(239): 703-5.
77. Kumari A, Rao NP, Patnaik U, et al. Management outcomes of mucormycosis in COVID-19 patients: A preliminary report from a tertiary care hospital. *Med J Armed Forces India* 2021; **77**(Suppl 2): S289-s95.
78. Kute VB, Meshram HS, Navadiya VV, et al. Consequences of the first and second COVID-19 wave on kidney transplant recipients at a large Indian transplant centre. *Nephrology (Carlton)* 2021.
79. Maini A, Tomar G, Khanna D, Kini Y, Mehta H, Bhagyasree V. Sino-orbital mucormycosis in a COVID-19 patient: A case report. *Int J Surg Case Rep* 2021; **82**: 105957.

80. Malhotra HS, Gupta P, Mehrotra D, et al. COVID-19 associated mucormycosis: Staging and management recommendations (Report of a multi-disciplinary expert committee). *J Oral Biol Craniofac Res* 2021; **11**(4): 569-80.
81. Manchanda S, Semalti K, Bhalla AS, Thakar A, Sikka K, Verma H. Revisiting rhino-orbito-cerebral acute invasive fungal sinusitis in the era of COVID-19: pictorial review. *Emerg Radiol* 2021: 1-10.
82. Manda D, Sen I, Thakral P, Das SS, Cb V, Malik D. Invasive Fungal Infection in COVID-19-Recovered Patient Detected on 18F-FDG-Labeled Leukocytes PET/CT Scan. *Clin Nucl Med* 2021.
83. Mangal R, Gehlot PS, Bang A, Kaushal A, Kolare R. Covid-19 associated rhino-orbito-cerebral mucormycosis: Clinical profile and imaging spectrum. *Journal of Clinical and Diagnostic Research* 2021; **15**(9): TC01-TC6.
84. Meher R, Wadhwa V, Kumar V, et al. COVID associated mucormycosis: A preliminary study from a dedicated COVID Hospital in Delhi. *Am J Otolaryngol* 2021; **43**(1): 103220.
85. Mekonnen ZK, Ashraf DC, Jankowski T, et al. Acute Invasive Rhino-Orbital Mucormycosis in a Patient With COVID-19-Associated Acute Respiratory Distress Syndrome. *Ophthalmic Plast Reconstr Surg* 2021; **37**(2): e40-e80.
86. Mishra Y, Prashar M, Sharma D, Akash, Kumar VP, Tilak T. Diabetes, COVID 19 and mucormycosis: Clinical spectrum and outcome in a tertiary care medical center in Western India. *Diabetes Metab Syndr* 2021; **15**(4): 102196.
87. Misra SR, Das R, Mohanty N. Sinomaxillary mucormycosis an increasingly common occurrence in the COVID-19 pandemic. *BMJ Case Rep* 2021; **14**(9).
88. Mitra S, Janweja M, Sengupta A. Post-COVID-19 rhino-orbito-cerebral mucormycosis: a new addition to challenges in pandemic control. *Eur Arch Otorhinolaryngol* 2021: 1-6.
89. Mohammadi F, Badri M, Safari S, Hemmat N. A case report of rhino-facial mucormycosis in a non-diabetic patient with COVID-19: a systematic review of literature and current update. *BMC Infect Dis* 2021; **21**(1): 906.
90. Moorthy A, Gaikwad R, Krishna S, et al. SARS-CoV-2, Uncontrolled Diabetes and Corticosteroids-An Unholy Trinity in Invasive Fungal Infections of the Maxillofacial Region? A Retrospective, Multi-centric Analysis. *J Maxillofac Oral Surg* 2021; **20**(3): 1-8.
91. Mulakavalupil B, Vaity C, Joshi S, Misra A, Pandit RA. Absence of Case of Mucormycosis (March 2020-May 2021) under strict protocol driven management care in a COVID-19 specific tertiary care intensive care unit. *Diabetes Metab Syndr* 2021; **15**(4): 102169.
92. Naik MN, Rath S. The ROC Staging System for COVID-related Rhino-Orbital-Cerebral Mucormycosis. *Semin Ophthalmol* 2021: 1-5.



93. Nair AG, Adulkar NG, D'Cunha L, et al. Rhino-orbital mucormycosis following COVID-19 in previously non-diabetic, immunocompetent patients. *Orbit* 2021; **40**(6): 499-504.
94. Nambiar M, Varma SR, Jaber M, Sreelatha SV, Thomas B, Nair AS. Mycotic infections - mucormycosis and oral candidiasis associated with Covid-19: a significant and challenging association. *J Oral Microbiol* 2021; **13**(1): 1967699.
95. Nasir N, Farooqi J, Mahmood SF, Jabeen K. COVID-19 associated mucormycosis: a life-threatening complication in patients admitted with severe to critical COVID-19 from Pakistan. *Clin Microbiol Infect* 2021.
96. Nehara HR, Puri I, Singhal V, Ih S, Bishnoi BR, Sirohi P. Rhinocerebral mucormycosis in COVID-19 patient with diabetes a deadly trio: Case series from the north-western part of India. *Indian J Med Microbiol* 2021; **39**(3): 380-3.
97. Ostovan VR, Rezapanah S, Behzadi Z, et al. Coronavirus disease (COVID-19) complicated by rhino-orbital-cerebral mucormycosis presenting with neurovascular thrombosis: a case report and review of literature. *J Neurovirol* 2021; **27**(4): 644-9.
98. Padma Srivastava MV, Vishnu VY, Pandit AK. Mucormycosis Epidemic and Stroke in India During the COVID-19 Pandemic. *Stroke* 2021: Strokeaha121036626.
99. Pakdel F, Ahmadikia K, Salehi M, et al. Mucormycosis in patients with COVID-19: A cross-sectional descriptive multicentre study from Iran. *Mycoses* 2021; **64**(10): 1238-52.
100. Palou EY, Ramos MA, Cherenfant E, et al. COVID-19 Associated Rhino-Orbital Mucormycosis Complicated by Gangrenous and Bone Necrosis-A Case Report from Honduras. *Vaccines (Basel)* 2021; **9**(8).
101. Paras P, Purvi P, Brijeshkumar S, Arunima B, Drasti P, Maitri B. Expanding the spectrum of fatal necrotizing fungal infections presented as sinonasal and rhino orbital mucormycosis and aspergillosis in post coronavirus disease. *European Journal of Molecular and Clinical Medicine* 2021; **8**(4): 101-10.
102. Pathak K, Karadwal A, Nayak P, Nayak S. Mucormycosis in post covid patient-a case report. *Indian Journal of Forensic Medicine and Toxicology* 2021; **15**(3): 240-4.
103. R R, Thanthoni M, Warriar AS. COVID-19 Coinfection With Mucormycosis in a Diabetic Patient. *Cureus* 2021; **13**(6): e15820.
104. Raghu DR, Daswaney DA, Gopinathan DV. Mucormycosis as a complication of Covid-19 - A case report. *Vis J Emerg Med* 2021; **25**: 101150.
105. Ramaswami A, Sahu AK, Kumar A, et al. COVID-19 associated Mucormycosis Presenting to the Emergency Department - An Observational Study of 70 Patients. *Qjm* 2021.

106. Rao R, Shetty AP, Nagesh CP. Orbital infarction syndrome secondary to rhino-orbital mucormycosis in a case of COVID-19: Clinico-radiological features. *Indian J Ophthalmol* 2021; **69**(6): 1627-30.
107. Rao VUS, Arakeri G, Madikeri G, Shah A, Oeppen RS, Brennan PA. COVID-19 associated mucormycosis (CAM) in India: a formidable challenge. *Br J Oral Maxillofac Surg* 2021.
108. Ravani SA, Agrawal GA, Leuva PA, Modi PH, Amin KD. Rise of the phoenix: Mucormycosis in COVID-19 times. *Indian J Ophthalmol* 2021; **69**(6): 1563-8.
109. Revannavar SM, P SS, Samaga L, V KV. COVID-19 triggering mucormycosis in a susceptible patient: a new phenomenon in the developing world? *BMJ Case Rep* 2021; **14**(4).
110. Roushdy T, Hamid E. A case series of post COVID-19 mucormycosis-a neurological prospective. *Egypt J Neurol Psychiatr Neurosurg* 2021; **57**(1): 100.
111. Sachdeva K, Saji TA. Adverse Drug Reaction of Antifungals in the Management of Black Fungus: A Tertiary Care Centre Experience. *Indian J Otolaryngol Head Neck Surg* 2021: 1-7.
112. Sahu ES, Sahu A, Ghodgaonkar P, Lahoti K, Bhargava A. COVID-19-associated rhino-orbital-cerebral mixed mycoses with intracranial fungal granuloma - An aggressively managed rare entity. *Indian J Ophthalmol* 2021; **69**(9): 2537-9.
113. Sai Krishna D, Raj H, Kurup P, Juneja M. Maxillofacial Infections in Covid-19 Era-Actuality or the Unforeseen: 2 Case Reports. *Indian J Otolaryngol Head Neck Surg* 2021: 1-4.
114. Saidha PK, Kapoor S, Das P, et al. Mucormycosis of Paranasal Sinuses of Odontogenic Origin Post COVID19 Infection: A Case Series. *Indian J Otolaryngol Head Neck Surg* 2021: 1-5.
115. Saldanha M, Reddy R, Vincent MJ. Title of the Article: Paranasal Mucormycosis in COVID-19 Patient. *Indian J Otolaryngol Head Neck Surg* 2021: 1-4.
116. Sanghvi D, Kale H. Imaging of COVID-19-associated craniofacial mucormycosis: a black and white review of the "black fungus". *Clin Radiol* 2021.
117. Sarkar S, Gokhale T, Choudhury SS, Deb AK. COVID-19 and orbital mucormycosis. *Indian J Ophthalmol* 2021; **69**(4): 1002-4.
118. Sarkar S, Gokhale T, Kaliaperumal S, Singh R, Begam RB, Deb AK. Exudative retinal detachment in COVID-19 - associated rhino-orbital mucormycosis - A rare clinical finding. *Indian J Ophthalmol* 2021; **69**(9): 2535-7.
119. Selarka L, Sharma AK, Rathod G, Saini D, Patel S, Sharma VK. Mucormycosis- A Dreaded Complication Of Covid-19. *Qjm* 2021.
120. Selarka L, Sharma S, Saini D, et al. Mucormycosis and COVID-19: An epidemic within a pandemic in India. *Mycoses* 2021; **64**(10): 1253-60.

121. Sen M, Honavar SG, Bansal R, et al. Epidemiology, clinical profile, management, and outcome of COVID-19-associated rhino-orbital-cerebral mucormycosis in 2826 patients in India - Collaborative OPAI-IJO Study on Mucormycosis in COVID-19 (COSMIC), Report 1. *Indian J Ophthalmol* 2021; **69**(7): 1670-92.
122. Sen M, Honavar SG, Sharma N, Sachdev MS. COVID-19 and Eye: A Review of Ophthalmic Manifestations of COVID-19. *Indian J Ophthalmol* 2021; **69**(3): 488-509.
123. Sen M, Lahane S, Lahane TP, Parekh R, Honavar SG. Mucor in a Viral Land: A Tale of Two Pathogens. *Indian J Ophthalmol* 2021; **69**(2): 244-52.
124. Sethi HS, Sen KK, Mohanty SS, Panda S, Krishna KR, Mali C. COVID-19-associated rhino-orbital mucormycosis (CAROM)—a case report. *Egyptian Journal of Radiology and Nuclear Medicine* 2021; **52**(1).
125. Shah KM, West C, Simpson J, Rainwater YB. Cutaneous mucormycosis following COVID-19 vaccination in a patient with bullous pemphigoid. *JAAD Case Rep* 2021; **15**: 80-1.
126. Shakir M, Maan MHA, Waheed S. Mucormycosis in a patient with COVID-19 with uncontrolled diabetes. *BMJ Case Rep* 2021; **14**(7).
127. Sharma K, Tiwari T, Goyal S, Sharma R. Rhino-orbito-cerebral mucormycosis causing cranial nerve abscess in post-COVID-19 status. *BMJ Case Rep* 2021; **14**(9).
128. Sharma S, Grover M, Bhargava S, Samdani S, Kataria T. Post coronavirus disease mucormycosis: a deadly addition to the pandemic spectrum. *J Laryngol Otol* 2021; **135**(5): 442-7.
129. Singh G, Vishnu VY. Neurological manifestations of rhino-oculo-cerebral mucormycosis in the COVID-19 era. *Nat Rev Neurol* 2021: 1-2.
130. Singh RP, Gupta N, Kaur T, Gupta A. Rare case of gastrointestinal mucormycosis with colonic perforation in an immunocompetent patient with COVID-19. *BMJ Case Rep* 2021; **14**(7).
131. Singh T, Chaudhari R, Gupta A. Renal artery thrombosis and mucormycosis in a COVID-19 patient. *Indian J Urol* 2021; **37**(3): 267-9.
132. Singh Y, Ganesh V, Kumar S, et al. Coronavirus Disease-Associated Mucormycosis from a Tertiary Care Hospital in India: A Case Series. *Cureus* 2021; **13**(7): e16152.
133. Sreshta K, Dave TV, Varma DR, et al. Magnetic resonance imaging in rhino-orbital-cerebral mucormycosis. *Indian J Ophthalmol* 2021; **69**(7): 1915-27.
134. Tabarsi P, Khalili N, Pourabdollah M, et al. Case Report: Coronavirus Disease 2019-associated Rhinosinusitis Mucormycosis Caused by *Rhizopus arrhizus*: A Rare but Potentially Fatal Infection Occurring After Treatment with Corticosteroids. *Am J Trop Med Hyg* 2021; **105**(2): 449-53.
135. Tabarsi P, Khalili N, Pourabdollah M, et al. Case report: COVID-19-associated Rhinosinusitis Mucormycosis caused by *Rhizopus arrhizus*: A rare but potentially fatal infection occurring after

treatment with Corticosteroids. *American Journal of Tropical Medicine and Hygiene* 2021; **105**(2): 449-53.

136. Varshney VK, Swami A, Thirunavukkarasu B, Agarwal A, Baid G. Synchronous Small Bowel Gangrene With Pyelonephritis Secondary to Mucormycosis: A Disastrous Complication of COVID-19 Pandemic. *Cureus* 2021; **13**(6): e15911.

137. Veisi A, Bagheri A, Eshaghi M, Rikhtehgar MH, Rezaei Kanavi M, Farjad R. Rhino-orbital mucormycosis during steroid therapy in COVID-19 patients: A case report. *Eur J Ophthalmol* 2021: 11206721211009450.

138. Venugopal A, Marya A. Palatal mucormycosis in a patient with SARS-CoV-2 infection. *Cmaj* 2021; **193**(32): E1254.

139. Verma DK, Bali RK. COVID-19 and Mucormycosis of the Craniofacial skeleton: Causal, Contributory or Coincidental? *J Maxillofac Oral Surg* 2021; **20**(2): 1-2.

140. Vinay K, Rudramurthy SM, Dogra S. Emergence of Mucormycosis during COVID-19 Pandemic and Dermatological Manifestations. *Indian Dermatol Online J* 2021; **12**(4): 493-6.

141. Wadhwa L, Khurana S. Rhino-Orbital Mucormycosis in a COVID-19 Patient Co-Infected With *Klebsiella Pneumoniae*. *Cureus* 2021; **13**(8): e17249.

142. Waizel-Haiat S, Guerrero-Paz JA, Sanchez-Hurtado L, Calleja-Alarcon S, Romero-Gutierrez L. A Case of Fatal Rhino-Orbital Mucormycosis Associated With New Onset Diabetic Ketoacidosis and COVID-19. *Cureus* 2021; **13**(2): e13163.

143. Werthman-Ehrenreich A. Mucormycosis with orbital compartment syndrome in a patient with COVID-19. *Am J Emerg Med* 2021; **42**: 264.e5-.e8.

#### **Review articles, abstracts, editorial, opinion, or letters on CAM (n=91)<sup>144-234</sup>**

144. Gangneux JP, Bougnoux ME, Dannaoui E, Cornet M, Zahar JR. Invasive fungal diseases during COVID-19: We should be prepared. *J Mycol Med* 2020; **30**(2): 100971.

145. Silva LN, de Mello TP, Ramos LS, Branquinha MH, Roudbary M, Dos Santos ALS. Fungal infections in covid-19-positive patients: A lack of optimal treatment options. *Current Topics in Medicinal Chemistry* 2020; **20**(22): 1951-7.

146. Song G, Liang G, Liu W. Fungal Co-infections Associated with Global COVID-19 Pandemic: A Clinical and Diagnostic Perspective from China. *Mycopathologia* 2020; **185**(4): 599-606.

147. Al-Tawfiq JA, Alhumaid S, Alshukairi AN, et al. COVID-19 and mucormycosis superinfection: the perfect storm. *Infection* 2021: 1-21.

148. Almas T, Nazar W, Khedro T, et al. COVID-19 and mucormycosis superinfection: Exploring the missing pathophysiological links. *Ann Med Surg (Lond)* 2021; **68**: 102655.

149. Banerjee I, Robinson J, Asim M, Sathian B, Banerjee I. Mucormycosis and COVID-19 an epidemic in a pandemic? *Nepal J Epidemiol* 2021; **11**(2): 1034-9.
150. Banerjee M, Pal R, Bhadada SK. Intercepting the deadly trinity of mucormycosis, diabetes and COVID-19 in India. *Postgrad Med J* 2021.
151. Bari MS, Hossain MJ, Akhter S, Emran TB. Delta variant and black fungal invasion: A bidirectional assault might worsen the massive second/third stream of COVID-19 outbreak in South-Asia. *Ethics Med Public Health* 2021; **19**: 100722.
152. Bhardwaj A. Mucormycosis in COVID-19, host-iron assimilation: Probiotics can be novel therapy. *Indian Journal of Physiology and Pharmacology* 2021; **65**(2): 138-9.
153. Bhatia M. The rise of mucormycosis in Covid-19 patients in India. *Expert Rev Anti Infect Ther* 2021: 1-2.
154. Bhatt K, Agolli A, Patel MH, et al. High mortality co-infections of COVID-19 patients: mucormycosis and other fungal infections. *Discoveries (Craiova)* 2021; **9**(1): e126.
155. Bhogireddy R, Krishnamurthy V, Jabaris SS, Pullaiah CP, Manohar S. Is Mucormycosis an inevitable complication of Covid-19 in India? *Braz J Infect Dis* 2021; **25**(3): 101597.
156. Biswas B, Pramanik I, Mandal S, Roy PS. Coronavirus disease 2019 and mucormycosis a global threat: A systemic review. *Asian Journal of Pharmaceutical and Clinical Research* 2021; **14**(8): 108-13.
157. Castañeda Solís KB, Granados Jaramillo C, Barbosa Salazar E, Lozano Hernández DI, Tello Zavala C, Gómez Gutiérrez B. Black fungus in India, is it really pathophysiological related to COVID-19? *Therapeutic Advances in Infectious Disease* 2021; **8**: 7.
158. Chandan S. Role of face masks in the rise of mucormycosis cases in India during the COVID-19 pandemic. *Journal of Global Infectious Diseases* 2021; **13**(3): 155-6.
159. Chandra S, Rawal R. The surge in Covid related mucormycosis. *J Infect* 2021; **83**(3): 381-412.
160. Chatterjee S, Vardhan B, Singh DK, Maitra A, Ojha UK. Should statins be considered for the management of mucormycosis in COVID-19? *Diabetes Metab Syndr* 2021; **15**(4): 102162.
161. Chavda VP, Apostolopoulos V. Mucormycosis - An opportunistic infection in the aged immunocompromised individual: A reason for concern in COVID-19. *Maturitas* 2021.
162. Chiurlo M, Mastrangelo A, Ripa M, Scarpellini P. Invasive fungal infections in patients with COVID-19: a review on pathogenesis, epidemiology, clinical features, treatment, and outcomes. *New Microbiol* 2021; **44**(2): 71-83.
163. Das S, Dhar S. Mucormycosis Following COVID-19 Infections: an Insight. *Indian J Surg* 2021: 1-2.

164. Devnath P, Dhama K, Tareq AM, Emran TB. Mucormycosis coinfection in the context of global COVID-19 outbreak: A fatal addition to the pandemic spectrum. *Int J Surg* 2021; **92**: 106031.
165. Divakar PK. Fungal Taxa Responsible for Mucormycosis/"Black Fungus" among COVID-19 Patients in India. *J Fungi (Basel)* 2021; **7**(8).
166. Essar MY, Khan H, Babar MS, et al. Mucormycosis, conflicts and COVID-19: A deadly recipe for the fragile health system of Afghanistan. *Int J Health Plann Manage* 2021.
167. Ezeokoli OT, Gcilitshana O, Pohl CH. Risk Factors for Fungal Co-Infections in Critically Ill COVID-19 Patients, with a Focus on Immunosuppressants. *J Fungi (Basel)* 2021; **7**(7).
168. Farias L, Damasceno LS, Bandeira SP, Barreto FKA, Leitão T, Cavalcanti LPG. COVID-19 associated Mucormycosis (CAM): Should Brazil be on alert? *Rev Soc Bras Med Trop* 2021; **54**: e04102021.
169. Frías-De-León MG, Pinto-Almazán R, Hernández-Castro R, et al. Epidemiology of Systemic Mycoses in the COVID-19 Pandemic. *J Fungi (Basel)* 2021; **7**(7).
170. Gambhir RS, Aggarwal A, Bhardwaj A, Kaur A, Sohi RK, Mehta S. Covid-19 and mucormycosis (Black Fungus): An epidemic within the pandemic. *Rocz Panstw Zakl Hig* 2021; **72**(3): 239-44.
171. Gandra S, Ram S, Levitz SM. The "Black Fungus" in India: The Emerging Syndemic of COVID-19-Associated Mucormycosis. *Ann Intern Med* 2021; **174**(9): 1301-2.
172. Gangakhedkar MR, Gupta R. Commentary on "Mucormycosis co-infection in the context of global COVID-19 outbreak: A fatal addition to the pandemic spectrum" (*Int J Surg* 2021, 92:106031) - A pulmonary perspective. *Int J Surg* 2021; **94**: 106116.
173. Garg P, Mittal S. Mass urine sugar testing to tackle post-COVID mucormycosis epidemic in India-MUSTARD concept. *Diabetes Metab Syndr* 2021; **15**(4): 102177.
174. Ghazi BK, Rackimuthu S, Wara UU, et al. Rampant Increase in Cases of Mucormycosis in India and Pakistan: A Serious Cause for Concern during the Ongoing COVID-19 Pandemic. *Am J Trop Med Hyg* 2021.
175. Ghosh A, Sarkar A, Paul P, Patel P. The rise in cases of mucormycosis, candidiasis and aspergillosis amidst COVID19. *Fungal Biol Rev* 2021.
176. Gumashta J, Gumashta R. COVID19 associated mucormycosis: Is GRP78 a possible link? *Journal of Infection and Public Health* 2021.
177. Gupta A, Sharma A, Chakrabarti A. The emergence of post-COVID-19 mucormycosis in India: Can we prevent it? *Indian J Ophthalmol* 2021; **69**(7): 1645-7.
178. Gupta A, Singh V. Mucormycosis: "The Black Fungus" trampling post-COVID-19 patients. *Natl J Maxillofac Surg* 2021; **12**(2): 131-2.

179. Gupta G, S R, Singh Y, et al. Emerging cases of mucormycosis under COVID-19 pandemic in India: Misuse of antibiotics. *Drug Dev Res* 2021.
180. Hooli SA, Gadre VN, Bage S, Gilvarkar MD. The aftermath of COVID-19 pandemic: Rhino-orbital mucormycosis. *Indian J Anaesth* 2021; **65**(7): 548-53.
181. Ish P, Ish S. Prevention of mucormycosis in COVID-19 - the need of the hour. *Indian J Ophthalmol* 2021; **69**(7): 1969.
182. Ismaiel WF, Abdelazim MH, Eldsoky I, et al. The impact of COVID-19 outbreak on the incidence of acute invasive fungal rhinosinusitis. *Am J Otolaryngol* 2021; **42**(6): 103080.
183. Jamal SA, Rayapati A. A look into the relationship between outdated coronavirus disease 2019 (COVID-19) treatment protocols and the overwhelming rise of mucormycosis in COVID-19 patients in India. *Infect Control Hosp Epidemiol* 2021: 1-2.
184. John TM, Jacob CN, Kontoyiannis DP. When Uncontrolled Diabetes Mellitus and Severe COVID-19 Converge: The Perfect Storm for Mucormycosis. *J Fungi (Basel)* 2021; **7**(4).
185. Jose A, Singh S, Roychoudhury A, Kholakiya Y, Arya S, Roychoudhury S. Current Understanding in the Pathophysiology of SARS-CoV-2-Associated Rhino-Orbito-Cerebral Mucormycosis: A Comprehensive Review. *J Maxillofac Oral Surg* 2021; **20**(3): 1-8.
186. Jy Ong J, Cy Chan A, Sharma AK, Sharma S, Sharma VK. The mucormycosis epidemic within COVID-19 pandemic- lessons from India. *Brain Behav Immun* 2021; **97**: 4-5.
187. Kamrul-Hasan AB, Selim S. Mucormycosis, The Deadly New Worry to COVID-19 Pandemic. *Mymensingh Med J* 2021; **30**(3): 874-80.
188. Kumar M, Sarma DK, Shubham S, et al. Mucormycosis in COVID-19 pandemic: Risk factors and linkages. *Curr Res Microb Sci* 2021; **2**: 100057.
189. Lall M, Anand KB, Singh Shergill SP, Sondhi A, Rai P. Spectrum of fungal infections in COVID patients: The double whammy! *Medical Journal Armed Forces India* 2021; **77**: S527-S9.
190. Mahalaxmi I, Jayaramayya K, Venkatesan D, et al. Mucormycosis: An opportunistic pathogen during COVID-19. *Environ Res* 2021; **201**: 111643.
191. Malhotra N, Bajwa SJS, Joshi M, Mehdiratta L, Kurdi M. Second wave of COVID-19 pandemic and the surge of mucormycosis: Lessons learnt and future preparedness: Indian Society of Anaesthesiologists (ISA National) Advisory and Position Statement. *Indian J Anaesth* 2021; **65**(6): 427-33.
192. Malini S, Pasupathi A. Mucormycosis: A rare fungal infection in patients affected with covid 19. *International Journal of Pharmaceutical Research* 2021; **13**(3): 976-9.
193. Mhatre S, Patravale V. Drug repurposing of triazoles against mucormycosis using molecular docking: A short communication. *Comput Biol Med* 2021; **136**: 104722.

194. MohanaSundaram A, Thukani Sathanantham S, Chinchole V, Patil B, Velayutham R. Fostering a deeper understanding of COVID-19-associated mucormycosis - A commentary on "The mucormycosis coinfection in the context of global COVID-19 outbreak: A fatal addition to the pandemic spectrum" (Int. J. Surg. 2021:106031). *Int J Surg* 2021; **94**: 106110.
195. Moona AA, Islam MR. Mucormycosis or black fungus is a new fright in India during covid-19 pandemic: Associated risk factors and actionable items. *Public Health Pract (Oxf)* 2021; **2**: 100153.
196. Nagesh CP. The "black fungus" through a gray lens: Imaging COVID-19-associated mucormycosis. *Indian J Ophthalmol* 2021; **69**(7): 1648-9.
197. Nambiar M, Varma SR, Damdoum M. Post-Covid alliance-mucormycosis, a fatal sequel to the pandemic in India. *Saudi J Biol Sci* 2021.
198. Narayanan S, Chua JV, Baddley JW. COVID-19 associated Mucormycosis (CAM): risk factors and mechanisms of disease. *Clin Infect Dis* 2021.
199. Nath S, Baidya DK. Mucormycosis in COVID-19: Is zinc a silent killer in India? *Indian Journal of Critical Care Medicine* 2021; **25**(9): 1079-80.
200. Pal R, Singh B, Bhadada SK, et al. COVID-19-associated mucormycosis: An updated systematic review of literature. *Mycoses* 2021.
201. Pandiar D, Kumar NS, Anand R, Kamboj M, Narwal A, Shameena PM. Does COVID 19 generate a milieu for propagation of mucormycosis? *Med Hypotheses* 2021; **152**: 110613.
202. Pasternak M, Olszanecki R. Mucormycosis in head and neck area - the emerging health problem in COVID-19 pandemic. The perspective of a dental practitioner. *Folia Med Cracov* 2021; **61**(2): 117-27.
203. Pothiawala S. Mitigating the Emerging Threat of Mucormycosis in COVID-19. *Proceedings of Singapore Healthcare* 2021.
204. Prakash H, Skiada A, Paul RA, Chakrabarti A, Rudramurthy SM. Connecting the Dots: Interplay of Pathogenic Mechanisms between COVID-19 Disease and Mucormycosis. *J Fungi (Basel)* 2021; **7**(8).
205. Rahman FI, Islam MR, Bhuiyan MA. Mucormycosis or black fungus infection is a new scare in South Asian countries during the COVID-19 pandemic: Associated risk factors and preventive measures. *J Med Virol* 2021.
206. Rajendra Santosh AB, Muddana K, Bakki SR. Fungal Infections of Oral Cavity: Diagnosis, Management, and Association with COVID-19. *SN Compr Clin Med* 2021: 1-12.
207. Ramphul K, Verma R, Kumar N, Ramphul Y, Mejias S, Lohana P. Rising concerns of Mucormycosis (Zygomycosis) among COVID-19 patients; an analysis and review based on case reports in literature. *Acta Biomed* 2021; **92**(4): e2021271.



208. Rastogi A, Khamesra A. Triple challenge of diabetes, COVID-19, and mucormycosis. *Int J Diabetes Dev Ctries* 2021: 1-2.
209. Raut A, Huy NT. Rising incidence of mucormycosis in patients with COVID-19: another challenge for India amidst the second wave? *Lancet Respir Med* 2021; **9**(8): e77.
210. Ravani SA, Agrawal GA, Leuva PA, Modi PH, Amin KD. Response to comments on: Rise of the phoenix: Mucormycosis in COVID-19 times. *Indian J Ophthalmol* 2021; **69**(9): 2553.
211. Rocha ICN, Hasan MM, Goyal S, et al. COVID-19 and mucormycosis syndemic: double health threat to a collapsing healthcare system in India. *Trop Med Int Health* 2021; **26**(9): 1016-8.
212. Rodriguez-Morales AJ, Mamani-García CS, Nuñez-Lupaca JN, et al. COVID-19 and mucormycosis in Latin America - An emerging concern. *Travel Med Infect Dis* 2021; **44**: 102156.
213. Rodriguez-Morales AJ, Sah R, Millan-Oñate J, et al. COVID-19 associated mucormycosis: the urgent need to reconsider the indiscriminate use of immunosuppressive drugs. *Ther Adv Infect Dis* 2021; **8**: 204993612111027065.
214. Rudramurthy SM, Hoenigl M, Meis JF, et al. ECMM/ISHAM recommendations for clinical management of COVID-19 associated mucormycosis in low- and middle-income countries. *Mycoses* 2021; **64**(9): 1028-37.
215. Sahu RK, Salem-Bekhit MM, Bhattacharjee B, et al. Mucormycosis in indian covid-19 patients: Insight into its patho-genesis, clinical manifestation, and management strategies. *Antibiotics* 2021; **10**(9).
216. Sakthivel P, Ish P. COVID-19 associated mucormycosis-elucidating the etiology of this emerging entity. *Qjm* 2021.
217. Santosh ABR, Muddana K, Bakki SR. Response to Commentary: Fungal Infections of Oral Cavity: Diagnosis, Management, and Association with COVID-19. *SN Compr Clin Med* 2021: 1-2.
218. Sarda R, Swain S, Ray A, Wig N. COVID-19 associated Mucormycosis and evolving evidence. *Qjm* 2021.
219. Sarda R, Swain S, Ray A, Wig N. COVID-19 associated Mucormycosis: An epidemic within a pandemic. *Qjm* 2021.
220. Singh AK, Singh R. Comments on: Rise of the phoenix: Mucormycosis in COVID-19 times. *Indian J Ophthalmol* 2021; **69**(9): 2552.
221. Singh AK, Singh R, Joshi SR, Misra A. Mucormycosis in COVID-19: A systematic review of cases reported worldwide and in India. *Diabetes Metab Syndr* 2021; **15**(4): 102146.
222. Singh R, Kumari A. Nasal Microbiota Imbalance as a Contributory Link in the Emergence of COVID-19 Associated Mucormycosis. *ACS Infect Dis* 2021; **7**(8): 2211-3.

223. Solanki B, Chouhan M, Shakrawal N. Mucor Alert: Triad of COVID-19, Corticosteroids Therapy and Uncontrolled Glycemic Index. *Indian J Otolaryngol Head Neck Surg* 2021: 1-3.
224. Soman R, Sunavala A. Post COVID-19 Mucormycosis in the Second Wave-Realities, Uncertainties and Myths. *J Assoc Physicians India* 2021; **69**(7): 11-2.
225. Soman R, Sunavala A. Post COVID-19 Mucormycosis - from the Frying Pan into the Fire. *J Assoc Physicians India* 2021; **69**(1): 13-4.
226. Suvvari TK, Arigapudi N, Kandi VR, Kutikuppala LS. Mucormycosis: A killer in the shadow of COVID-19. *J Mycol Med* 2021; **31**(3): 101161.
227. Szarpak L, Chirico F, Pruc M, Szarpak L, Dzieciatkowski T, Rafique Z. Mucormycosis-A serious threat in the COVID-19 pandemic? *J Infect* 2021; **83**(2): 237-79.
228. Tandon A, Pandey L. COVID-19, steroids, and mucormycosis: What an ophthalmologist should know. *Indian J Ophthalmol* 2021; **69**(7): 1970.
229. Tandon A, Tandon S. COVID-19 and Mucormycosis: Time we Answer Questions? *J Assoc Physicians India* 2021; **69**(7): 11-2.
230. Thakar A, Lal D. "Black fungus": a perspective on the coronavirus disease 2019 (COVID-19)-associated rhino-orbital mucormycosis epidemic in India. *Int Forum Allergy Rhinol* 2021; **11**(8): 1278-9.
231. Vuorio A, Kovanen PT. Mucormycosis and glucose-regulated protein 78 in COVID-19: Amenable to statin treatment? *J Intern Med* 2021; **290**(4): 931-3.
232. Pushparaj K, Kuchi Bhotla H, Arumugam VA, et al. Mucormycosis (black fungus) ensuing COVID-19 and comorbidity meets - Magnifying global pandemic grievance and catastrophe begins. *Science of the Total Environment* 2022; **805**.
233. Unnikrishnan R, Misra A. Infections and diabetes: Risks and mitigation with reference to India. *Diabetes and Metabolic Syndrome: Clinical Research and Reviews* 2020; **14**(6): 1889-94.
234. Abdoli A, Falahi S, Kenarkoobi A. COVID-19-associated opportunistic infections: a snapshot on the current reports. *Clin Exp Med* 2021: 1-20.

#### **Articles on COVID-19-associated pulmonary aspergillosis (n=2)<sup>235,236</sup>**

235. Fekkar A, Lampros A, Mayaux J, et al. Occurrence of invasive pulmonary fungal infections in patients with severe COVID-19 admitted to the ICU. *American Journal of Respiratory and Critical Care Medicine* 2021; **203**(3): 307-17.
236. Mascarenhas E, Deere LS, Bojanowski CM. Invasive Pulmonary Aspergillosis in the Recovery Phase of COVID-19. *American Journal of Respiratory and Critical Care Medicine* 2021; **203**(9).

**Key articles used to guide the formulation of questions to be addressed by the Delphi process**

**(identified by systematic review of literature and from our personal files)**

Epidemiology<sup>1-13</sup>

1. Patel A, Agarwal R, Rudramurthy SM, et al. Multicenter Epidemiologic Study of Coronavirus Disease-Associated Mucormycosis, India. *Emerg Infect Dis* 2021; 27(9): 2349-59.
2. Gangneux JP, Dannaoui E, Fekkar A, et al. Fungal infections in mechanically ventilated patients with COVID-19 during the first wave: the French multicentre MYCOVID study. *Lancet Respir Med* 2021.
3. Guzman-Castro S, Chora-Hernandez LD, Trujillo-Alonso G, et al. COVID-19-associated mucormycosis, diabetes and steroid therapy: Experience in a single centre in Western Mexico. *Mycoses* 2021.
4. Muthu V, Rudramurthy SM, Chakrabarti A, Agarwal R. Epidemiology and Pathophysiology of COVID-19-Associated Mucormycosis: India Versus the Rest of the World. *Mycopathologia* 2021; 186(6): 739-54.
5. Danion F, Letscher-Bru V, Guitard J, et al. COVID-19 associated mucormycosis in France: a rare but deadly complication. *Open Forum Infectious Diseases* 2021.
6. Rabagliati R, Rodriguez N, Nunez C, Huete A, Bravo S, Garcia P. COVID-19-Associated Mold Infection in Critically Ill Patients, Chile. *Emerg Infect Dis* 2021; 27(5): 1454-6.
7. Hussain S, Riad A, Singh A, et al. Global Prevalence of COVID-19-Associated Mucormycosis (CAM): Living Systematic Review and Meta-Analysis. *J Fungi (Basel)* 2021; 7(11).
8. Hussain S, Baxi H, Riad A, et al. COVID-19-Associated Mucormycosis (CAM): An Updated Evidence Mapping. *Int J Environ Res Public Health* 2021; 18(19).
9. Sinha A, Bhaskar SMM. In-hospital prevalence of mucormycosis among coronavirus disease 2019 (COVID-19) patients and COVID-19 in mucormycosis: a systematic review and meta-analysis. *Int Forum Allergy Rhinol* 2021.
10. Prakash H, Chakrabarti A. Global Epidemiology of Mucormycosis. *J Fungi (Basel)* 2019; 5(1): 26.
11. Jeong W, Keighley C, Wolfe R, et al. The epidemiology and clinical manifestations of mucormycosis: a systematic review and meta-analysis of case reports. *Clin Microbiol Infect* 2019; 25(1): 26-34.
12. Hoenigl M, Seidel D, Carvalho A, et al. The emergence of COVID-19 associated mucormycosis: a review of cases from 18 countries. *Lancet Microbe* 2022; In press.

13. Patel A, Kaur H, Xess I, et al. A multicentre observational study on the epidemiology, risk factors, management and outcomes of mucormycosis in India. *Clin Microbiol Infect* 2020; 26(7): 944 e9- e15.

*Risk factors for CAM*<sup>14-17</sup>

14. Bhanuprasad K, Manesh A, Devasagayam E, et al. Risk factors associated with the mucormycosis epidemic during the COVID-19 pandemic. *Int J Infect Dis* 2021; 111: 267-70.
15. Muthu V, Kumar M, Paul RA, et al. Is there an association between zinc and COVID-19-associated mucormycosis? Results of an experimental and clinical study. *Mycoses* 2021; 64(10): 1291-7.
16. Arora U, Priyadarshi M, Katiyar V, et al. Risk factors for Coronavirus disease-associated mucormycosis. *J Infect* 2021.
17. Kumar HM, Sharma P, Rudramurthy SM, et al. Serum iron indices in COVID-19-associated mucormycosis: A case-control study. *Mycoses* 2021.

*Clinical features and imaging*<sup>11,18-24</sup>

18. Cornely OA, Alastruey-Izquierdo A, Arenz D, et al. Global guideline for the diagnosis and management of mucormycosis: an initiative of the European Confederation of Medical Mycology in cooperation with the Mycoses Study Group Education and Research Consortium. *Lancet Infect Dis* 2019; 19(12): e405-e21.
19. Garg M, Prabhakar N, Muthu V, et al. CT Findings of COVID-19-associated Pulmonary Mucormycosis: A Case Series and Literature Review. *Radiology* 2022; 302(1): 214-7.
20. Pruthi H, Muthu V, Bhujade H, et al. Pulmonary Artery Pseudoaneurysm in COVID-19-Associated Pulmonary Mucormycosis: Case Series and Systematic Review of the Literature. *Mycopathologia* 2021: 1-7.
21. Chamilos G, Marom EM, Lewis RE, Lionakis MS, Kontoyiannis DP. Predictors of pulmonary zygomycosis versus invasive pulmonary aspergillosis in patients with cancer. *Clin Infect Dis* 2005; 41(1): 60-6.
22. Bellanger AP, Navellou JC, Lepiller Q, et al. Mixed mold infection with *Aspergillus fumigatus* and *Rhizopus microsporus* in a severe acute respiratory syndrome Coronavirus 2 (SARS-CoV-2) patient. *Infect Dis Now* 2021; 51(7): 633-5.
23. Peng M, Meng H, Sun Y, et al. Clinical features of pulmonary mucormycosis in patients with different immune status. *J Thorac Dis* 2019; 11(12): 5042-52.

24. Yılmaz Demirci N, Uğraş Dikmen A, Taşçı C, et al. Relationship between chest computed tomography findings and clinical conditions of coronavirus disease (COVID-19): A multicentre experience. *Int J Clin Pract* 2021; 75(9): e14459.

*Diagnosis and differential diagnosis*<sup>25-35</sup>

25. Skiada A, Lass-Floerl C, Klimko N, Ibrahim A, Roilides E, Petrikkos G. Challenges in the diagnosis and treatment of mucormycosis. *Med Mycol* 2018; 56(suppl\_1): 93-101.

26. Lin CY, Wang IT, Chang CC, et al. Comparison of Clinical Manifestation, Diagnosis, and Outcomes of Invasive Pulmonary Aspergillosis and Pulmonary Mucormycosis. *Microorganisms* 2019; 7(11).

27. Wehrle-Wieland E, Affolter K, Goldenberger D, et al. Diagnosis of invasive mold diseases in patients with hematological malignancies using *Aspergillus*, *Mucorales*, and panfungal PCR in BAL. *Transpl Infect Dis* 2018; 20(5): e12953.

28. Walsh TJ, Gamaletsou MN, McGinnis MR, Hayden RT, Kontoyiannis DP. Early clinical and laboratory diagnosis of invasive pulmonary, extrapulmonary, and disseminated mucormycosis (zygomycosis). *Clin Infect Dis* 2012; 54 Suppl 1: S55-60.

29. Muthu V, Gandra RR, Dhooria S, et al. Role of flexible bronchoscopy in the diagnosis of invasive fungal infections. *Mycoses* 2021; 64(6): 668-77.

30. Lass-Flörl C, Aigner M, Nachbaur D, et al. Diagnosing filamentous fungal infections in immunocompromised patients applying computed tomography-guided percutaneous lung biopsies: a 12-year experience. *Infection* 2017; 45(6): 867-75.

31. Lackner N, Posch W, Lass-Flörl C. Microbiological and Molecular Diagnosis of Mucormycosis: From Old to New. *Microorganisms* 2021; 9(7).

32. Son HJ, Song JS, Choi S, et al. A comparison of histomorphologic diagnosis with culture- and immunohistochemistry-based diagnosis of invasive aspergillosis and mucormycosis. *Infect Dis (Lond)* 2020; 52(4): 279-83.

33. McAdams HP, Rosado de Christenson M, Strollo DC, Patz EF, Jr. Pulmonary mucormycosis: radiologic findings in 32 cases. *AJR Am J Roentgenol* 1997; 168(6): 1541-8.

34. Nam BD, Kim TJ, Lee KS, Kim TS, Han J, Chung MJ. Pulmonary mucormycosis: serial morphologic changes on computed tomography correlate with clinical and pathologic findings. *Eur Radiol* 2018; 28(2): 788-95.

35. Hammer MM, Madan R, Hatabu H. Pulmonary Mucormycosis: Radiologic Features at Presentation and Over Time. *AJR Am J Roentgenol* 2018; 210(4): 742-7.

### Treatment and response assessment<sup>36-45</sup>

36. Segal BH, Herbrecht R, Stevens DA, et al. Defining responses to therapy and study outcomes in clinical trials of invasive fungal diseases: Mycoses Study Group and European Organization for Research and Treatment of Cancer consensus criteria. *Clin Infect Dis* 2008; 47(5): 674-83.
37. Cornely OA, Maertens J, Bresnik M, et al. Liposomal amphotericin B as initial therapy for invasive mold infection: a randomized trial comparing a high-loading dose regimen with standard dosing (AmBiLoad trial). *Clin Infect Dis* 2007; 44(10): 1289-97.
38. Schwarz P, Cornely OA, Dannaoui E. Antifungal combinations in Mucorales: A microbiological perspective. *Mycoses* 2019; 62(9): 746-60.
39. Chamilos G, Lewis RE, Kontoyiannis DP. Delaying amphotericin B-based frontline therapy significantly increases mortality among patients with hematologic malignancy who have zygomycosis. *Clin Infect Dis* 2008; 47(4): 503-9.
40. Marty FM, Ostrosky-Zeichner L, Cornely OA, et al. Isavuconazole treatment for mucormycosis: a single-arm open-label trial and case-control analysis. *Lancet Infect Dis* 2016; 16(7): 828-37.
41. Spellberg B, Ibrahim AS, Chin-Hong PV, et al. The Deferasirox-AmBisome Therapy for Mucormycosis (DEFEAT Mucor) study: a randomized, double-blinded, placebo-controlled trial. *J Antimicrob Chemother* 2012; 67(3): 715-22.
42. van Burik JA, Hare RS, Solomon HF, Corrado ML, Kontoyiannis DP. Posaconazole is effective as salvage therapy in zygomycosis: a retrospective summary of 91 cases. *Clin Infect Dis* 2006; 42(7): e61-5.
43. Pulle MV, Puri HV, Asaf BB, Bishnoi S, Sharma S, Kumar A. Outcomes of early anti-fungal therapy with aggressive surgical resection in pulmonary mucormycosis. *Lung India* 2021; 38(4): 314-20.
44. Lanternier F, Poiree S, Elie C, et al. Prospective pilot study of high-dose (10 mg/kg/day) liposomal amphotericin B (L-AMB) for the initial treatment of mucormycosis. *J Antimicrob Chemother* 2015; 70(11): 3116-23.
45. Skiada A, Lanternier F, Groll AH, et al. Diagnosis and treatment of mucormycosis in patients with hematological malignancies: guidelines from the 3rd European Conference on Infections in Leukemia (ECIL 3). *Haematologica* 2013; 98(4): 492-504.

### Miscellaneous<sup>18,46-48</sup>

46. Koehler P, Bassetti M, Chakrabarti A, et al. Defining and managing COVID-19-associated pulmonary aspergillosis: the 2020 ECMM/ISHAM consensus criteria for research and clinical guidance. *Lancet Infect Dis* 2021; 21(6): e149-e62.
47. Verweij PE, Brüggemann RJM, Azoulay E, et al. Taskforce report on the diagnosis and clinical management of COVID-19 associated pulmonary aspergillosis. *Intensive Care Med* 2021; 47(8): 819-34.
48. Verweij PE, Gangneux JP, Bassetti M, et al. Diagnosing COVID-19-associated pulmonary aspergillosis. *Lancet Microbe* 2020; 1(2): e53-e5.
